# Supplementary material for: Graphene-encapsulated nickel–copper bimetallic nanoparticle catalysts for electrochemical reduction of CO2to CO
Source: Royal Society of Chemistry journal article supplement (doi:10.1039/d0cc04779a), 2020-01-01
Supplement: d0cc04779a1.pdf [file d0cc04779a1.pdf]

Electronic Supplementary Information

**Graphene-encapsulated nickel-copper bimetallic nanoparticle catalysts for electrochemical reduction of CO<sub>2</sub> to CO**

Chaochen Xu,<sup>a</sup> Anthony Vasileff,<sup>a</sup> Bo Jin,<sup>a</sup> Dan Wang,<sup>b</sup> Haolan Xu,<sup>c</sup> Yao Zheng\*<sup>a</sup>, and Shi-Zhang Qiao\*<sup>a</sup>

<sup>a</sup> Centre for Materials in Energy and Catalysis, School of Chemical Engineering and Advanced Materials, The University of Adelaide, Adelaide, SA 5005, Australia

<sup>b</sup> Institute of Process Engineering, Chinese Academy of Sciences, Beijing, 100190, China

<sup>c</sup> Future Industries Institute, University of South Australia, SA 5095, Australia

\* Email: s.qiao@adelaide.edu.au, yao.zheng01@adelaide.edu.au

## Part I: Experimental Section

### Chemicals

Nickel(II) nitrate hexahydrate ( $\text{Ni}(\text{NO}_3)_2 \cdot 6\text{H}_2\text{O}$ ), copper(II) nitrate hemi-pentahydrate ( $\text{Cu}(\text{NO}_3)_2 \cdot 2.5\text{H}_2\text{O}$ ), ethylenediaminetetraacetic acid (EDTA), *N,N*-dimethylformamide (DMF), trimethylamine (TMA), potassium bicarbonate ( $\text{KHCO}_3$ ), dimethyl sulfoxide (DMSO), phenol, and deuterium oxide ( $\text{D}_2\text{O}$ ) were purchased from Sigma-Aldrich and were used without further purification. Deionized water (DI water,  $18 \text{ M}\Omega \cdot \text{cm}$ ) was from a Milli-Q water purifier. A 0.05 wt.% Nafion solution was diluted from LIQUion™ Solutions (LQ-1115 - 1100 EW at 15 wt.%). Ultra-high purity Ar (99.999%),  $\text{N}_2$  (99.999%), and laser grade  $\text{CO}_2$  (99.995%) were supplied from BOC Gas.

### Synthesis Method

NiCu bimetallic nanoparticles were prepared using a modified method.<sup>1</sup> 0.6 g of EDTA and 1.0 mL of TMA were dissolved in 30 mL DMF and formed EDTA solution. The bimetallic salt solution was prepared by dissolution of specific ratios of nickel(II) and copper(II) nitrate salts in 20 mL DMF. For example, 1.4 g of the Ni salt and 0.3 g of the Cu salt were used for the preparation of  $\text{NiCu}_{0.25}$  salt solution. For  $\text{NiCu}_{0.5}$  and NiCu salt solution, 1.2 and 0.9 g of the Ni salt and 0.5 and 0.7 g of the Cu salt were used, respectively. The bimetallic salt solution was then added dropwise to the EDTA solution under vigorous stirring. A clear gelatinous precipitate was received after washing with DMF three times by centrifugation (6000 rpm). The washed precipitate was dried in a vacuum oven at  $80^\circ\text{C}$  overnight. The fully dried resultant was transferred to a tube furnace and was annealed at  $550^\circ\text{C}$  with a heating rate of  $10^\circ\text{C} \cdot \text{min}^{-1}$  for 1 h under Ar atmosphere. Once cooled to room temperature, the received black powder was washed with DI water three times and was dried in a vacuum oven at  $60^\circ\text{C}$  overnight again. For comparison, single Ni or Cu nanoparticles were synthesized using the same method by adding 1.7 g of the Ni salt or 1.4 g of the Cu salt only.

### Material Characterization

Scanning electron microscopy (SEM) images and energy dispersive spectroscopy (EDS) spectra were acquired with FEI Quanta 450. Transmission electron microscopy (TEM) images and selected area electron diffraction (SAED) patterns were taken using Philips CM200. High-angle annular dark-field scanning transmission electron microscopy (HAADF-STEM) images and EDS spectra were acquired with FEI Titan Themis 80-200. X-ray powder diffraction

(XRD) patterns were recorded on a Rigaku X-Ray Diffractometer (Cu K $\alpha$ ,  $\lambda = 1.5406 \text{ \AA}$ ). X-ray photoelectron spectroscopy (XPS) measurements were performed on Kratos AXIS Ultra (mono Al K $\alpha$ ), and all spectra were calibrated to the C-C peak at 284.8 eV. X-ray absorption spectra were collected from the soft X-ray spectroscopy (sXAS) and X-ray absorption spectroscopy (XAS) beamlines at the Australian synchrotron. All spectra were calibrated by corresponding reference standards of metal foils (Cu K-edge at 8978.9 eV, Ni L $_3$ -edge at 853.0 eV, and Cu L $_3$ -edge at 934.3 eV). The position of the absorption edge was determined from the first derivatives of the spectrum. X-ray absorption near edge structure (XANES) and extended X-ray absorption fine structure (EXAFS) data processing was conducted in Athena. Raman spectra were collected using a Raman spectroscopy (HORIBA LabRAM HR Evolution) configured by an MPLN50x objective lens (Olympus) and a 633-nm laser (CVI Melles Griot).

### Electrochemical Measurements

The experiments were performed on an electrochemical workstation (CH Instruments 760E) using a three-electrode H-cell separated by a proton exchange membrane (Nafion 117). A glassy carbon electrode ( $\varnothing 5 \text{ mm}$ ), Ag/AgCl (3.5 M KCl), and RuO $_2$ -coated titanium mesh served as the working, reference, and counter electrodes, respectively. To prepare a catalyst ink, 4 mg of catalyst was ultrasonically dispersed in 2 mL of 0.05 wt.% Nafion aqueous solution. Then, 40  $\mu\text{L}$  of the ink was dropped onto the surface of the glassy carbon and dried in air, resulting in a catalyst loading of 0.4 mg $\cdot\text{cm}^{-2}$ . The electrochemical measurements including cyclic voltammetry (CV), linear scan voltammetry (LSV), and chronoamperometry  $i$ - $t$  curve ( $i$ - $t$ ) were carried out in CO $_2$ -saturated 0.1 M KHCO $_3$  electrolyte (pH = 6.8) under a stirring rate of 100 rpm. All  $iR$ -corrected potentials were converted to the reversible hydrogen electrode (RHE) at 20°C:

$$E (V \text{ vs. RHE}) = E (V \text{ vs. Ag/AgCl}) + 0.059 \times pH + 0.205$$

where  $pH$  is measured using a pH meter.

For the analysis of electrochemical kinetics, Tafel slopes were derived from the Tafel equation:

$$\eta = b \lg (j_{CO} / j_0)$$

where  $\eta$  [V] is an overpotential between the applied potential to the standard CO $_2$ /CO reduction potential ( $E_{\text{CO}_2/\text{CO}} = -0.11 \text{ V vs. RHE}$ );  $b$  is the Tafel slope [mV $\cdot\text{dec}^{-1}$ ];  $j_{CO}$  is the partial current density of CO;  $j_0$  is the exchange current density of CO [mA $\cdot\text{cm}^{-2}$ ].

## Product Evaluation

Briefly, 100  $\mu\text{L}$  of headspace gas in the cathode compartment was manually injected into gas chromatography (GC, Agilent 7890B configured with TCD and Methanizer/FID) for gas product quantification *via* a syringe; The liquid products were determined using nuclear magnetic resonance spectroscopy (NMR, Agilent 500/600 MHz  $^1\text{H}$  NMR) and were quantified with internal standards (DMSO and phenol in  $\text{D}_2\text{O}$ ).<sup>2</sup> No detectable liquid products were found in this work. Faradaic efficiency of a certain product was calculated by:

$$FE_i = n_i e F / Q_t \times 100\%$$

where  $n_i$  is the total amount of a certain product  $i$  [mol];  $e$  is the number of electrons transferred for the product  $i$  formation, which equals to two for both  $\text{CO}$  and  $\text{H}_2$ ;  $F$  is the Faradaic constant [ $\text{C}\cdot\text{mol}^{-1}$ ];  $Q_t$  is the total amount of passed charge [C].

## *In-situ* Raman Spectroscopy Measurements

The same catalyst inks used for electrochemical measurements were also used for *in-situ* Raman spectroscopy measurements. 40  $\mu\text{L}$  of catalyst ink was uniformly deposited on a 5 mm  $\times$  4 mm screen-printed working electrode (Pine Research Instrumentation, RRPE1002C). The electrode was then transferred to a vacuum oven and was dried at 60°C. The fully dried electrode was connected to the 760E electrochemical workstation *via* a cell grip and USB connector and was then attached on a microscope slide at the sample stage. 100  $\mu\text{L}$  of  $\text{CO}_2$ -saturated 0.1M  $\text{KHCO}_3$  electrolyte was dropwise added on the electrode. A coverslip was then placed on the top of the electrode. *In-situ* Raman spectra were collected using a Raman spectroscopy (HORIBA LabRAM HR Evolution) configured by an MPLN50x objective lens (Olympus), 1800 l/mm grating, and a 633-nm Raman laser. Baseline correction was applied in all *in-situ* Raman spectra. All applied potentials were converted to RHE at 20°C:

$$E (V \text{ vs. RHE}) = E (V \text{ vs. Ag/AgCl}) + 0.059 \times pH + 0.527$$

where  $pH$  is measured using a pH meter.

## Part II: Supplementary Results

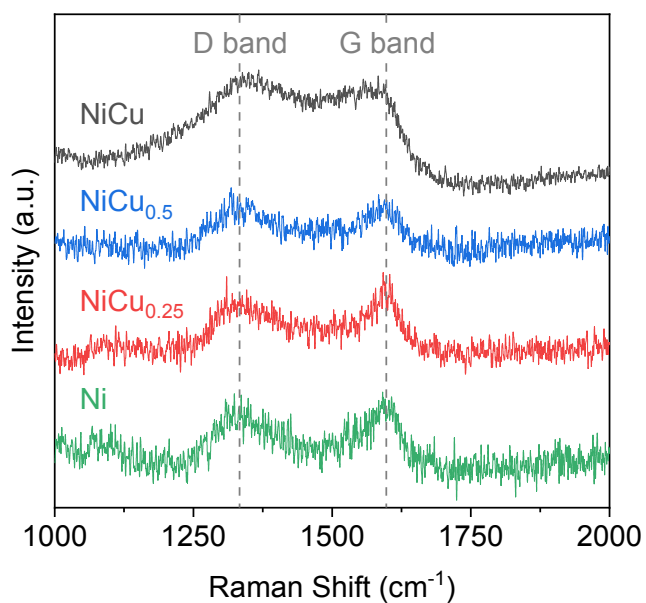

**Fig. S1** Raman spectroscopy spectra. The dash lines are assigned to the D- ( $\sim 1350 \text{ cm}^{-1}$ ) and G- ( $\sim 1580 \text{ cm}^{-1}$ ) band peaks.

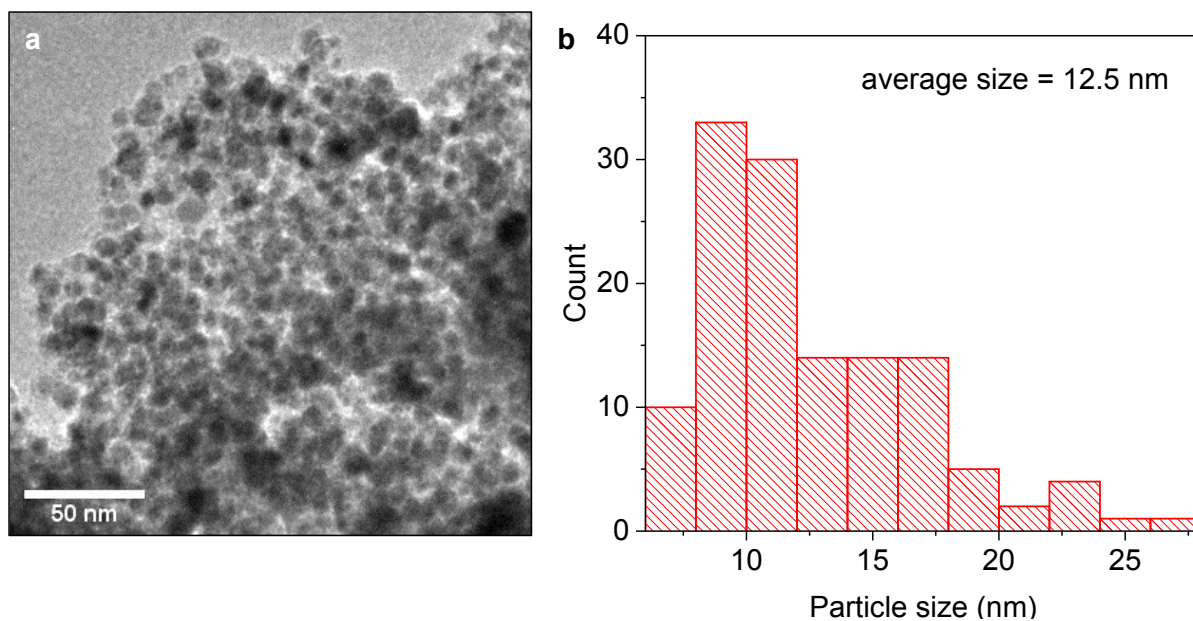

**Fig. S2** (a) TEM image of NiCu<sub>0.25</sub> and (b) its corresponding particle size distribution.

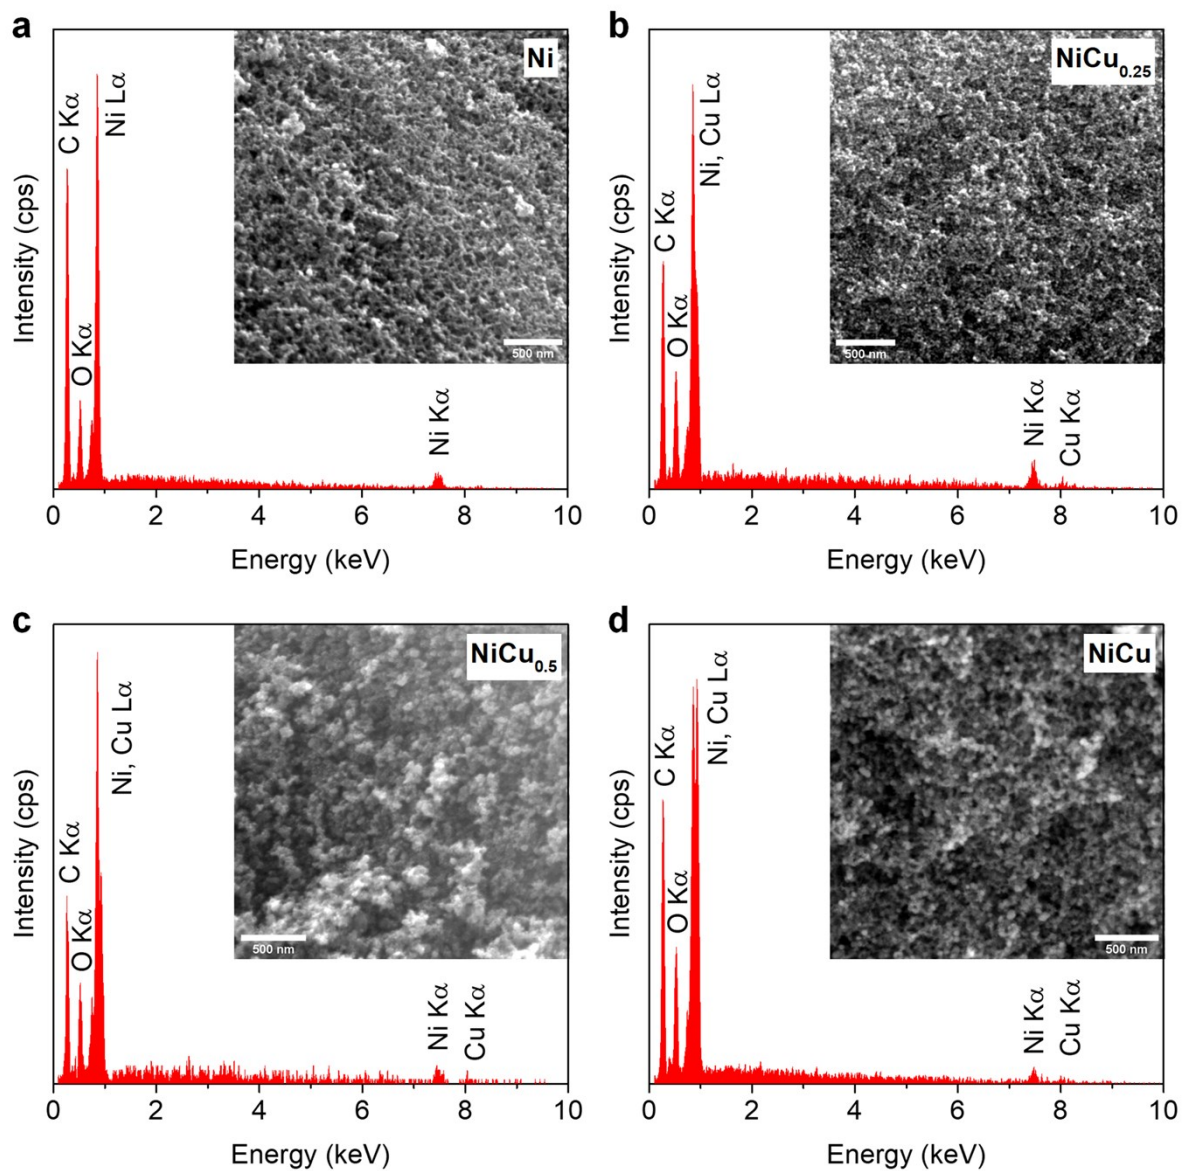

**Fig. S3** SEM images (inset) and corresponding EDS elemental analysis of (a) Ni, (b) NiCu<sub>0.25</sub>, (c) NiCu<sub>0.5</sub>, and (d) NiCu (scale bars = 500 nm).

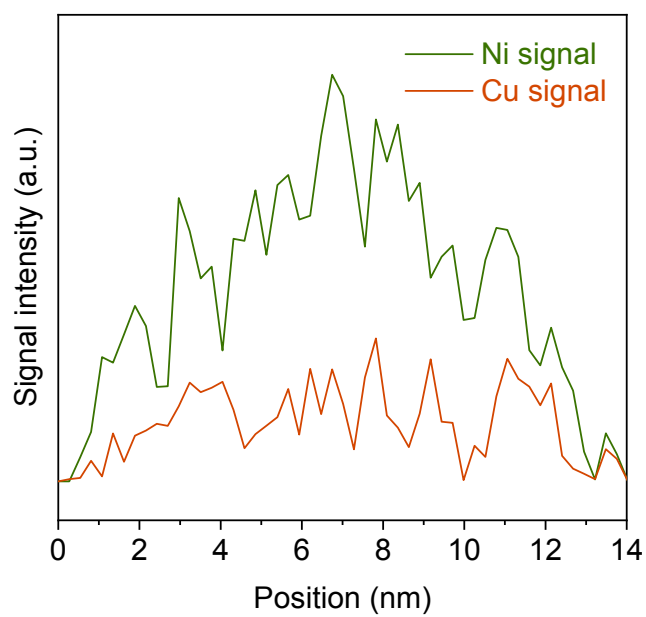

**Fig. S4** EDS line scan of NiCu<sub>0.25</sub> along the arrowed direction in Fig. 1(b).

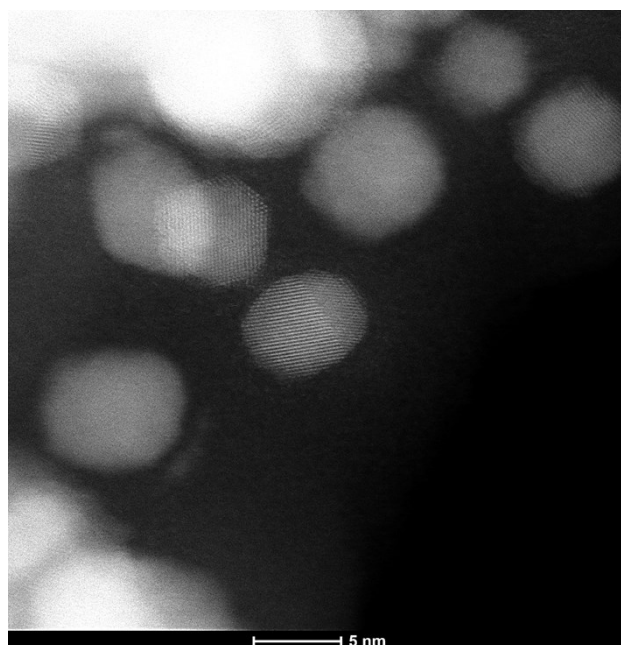

**Fig. S5** HAADF-STEM images of Ni-Cu bimetallic nanoparticle catalysts.

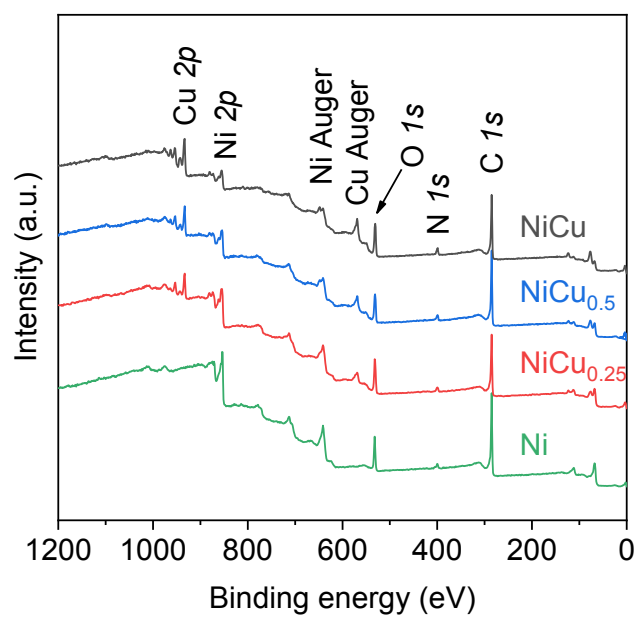

**Fig. S6** XPS survey spectra with distinct signals of C, N, O, Ni, and Cu.

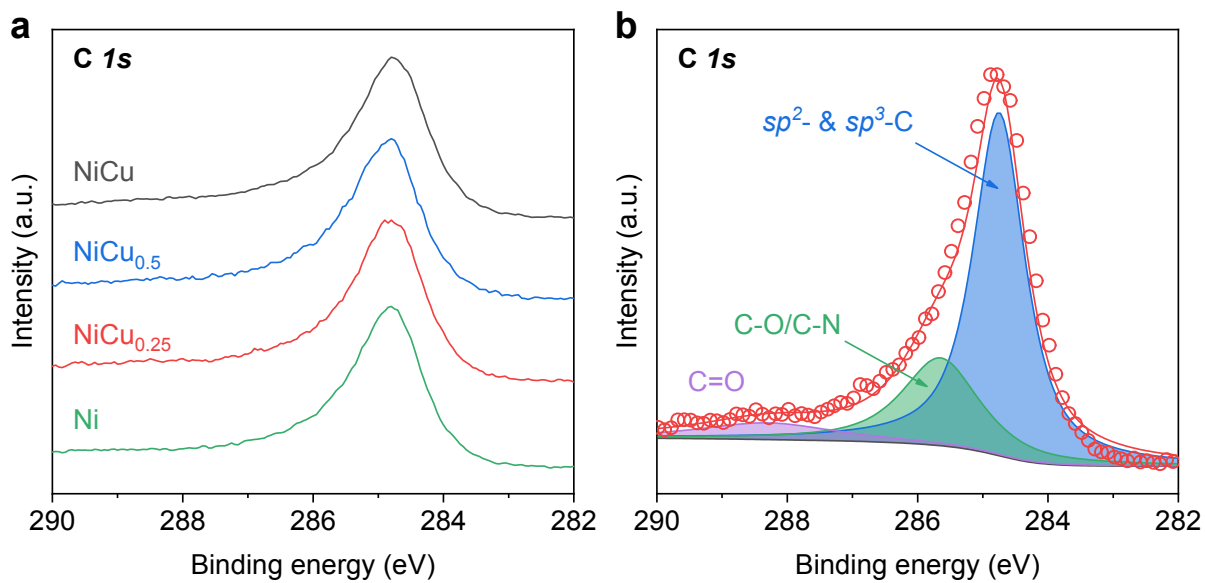

**Fig. S7** High-resolution XPS spectra of (a) C 1s and (b) the deconvoluted spectrum of NiCu<sub>0.25</sub>.



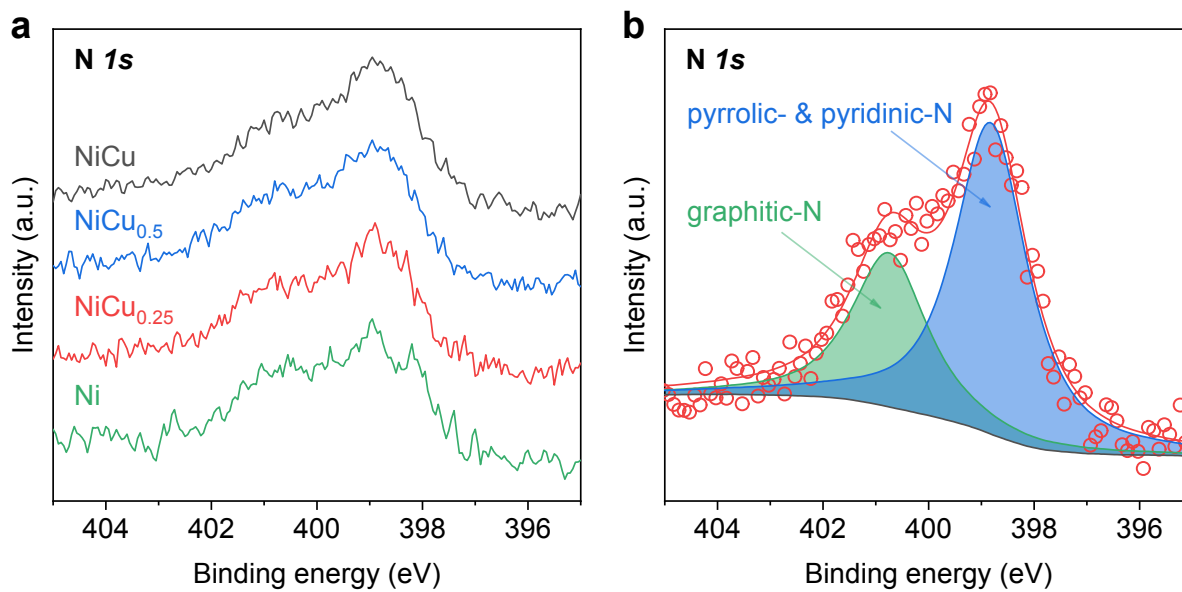

**Fig. S8** High-resolution XPS spectra of (a) N 1s and (b) the deconvoluted spectrum of NiCu<sub>0.25</sub>.

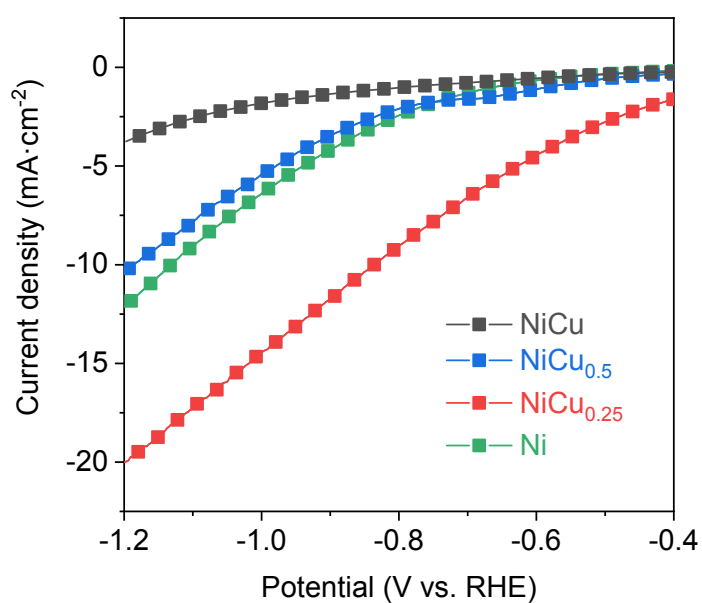

**Fig. S9** LSV polarization curves in CO<sub>2</sub>-saturated 0.1 M KHCO<sub>3</sub> electrolyte.

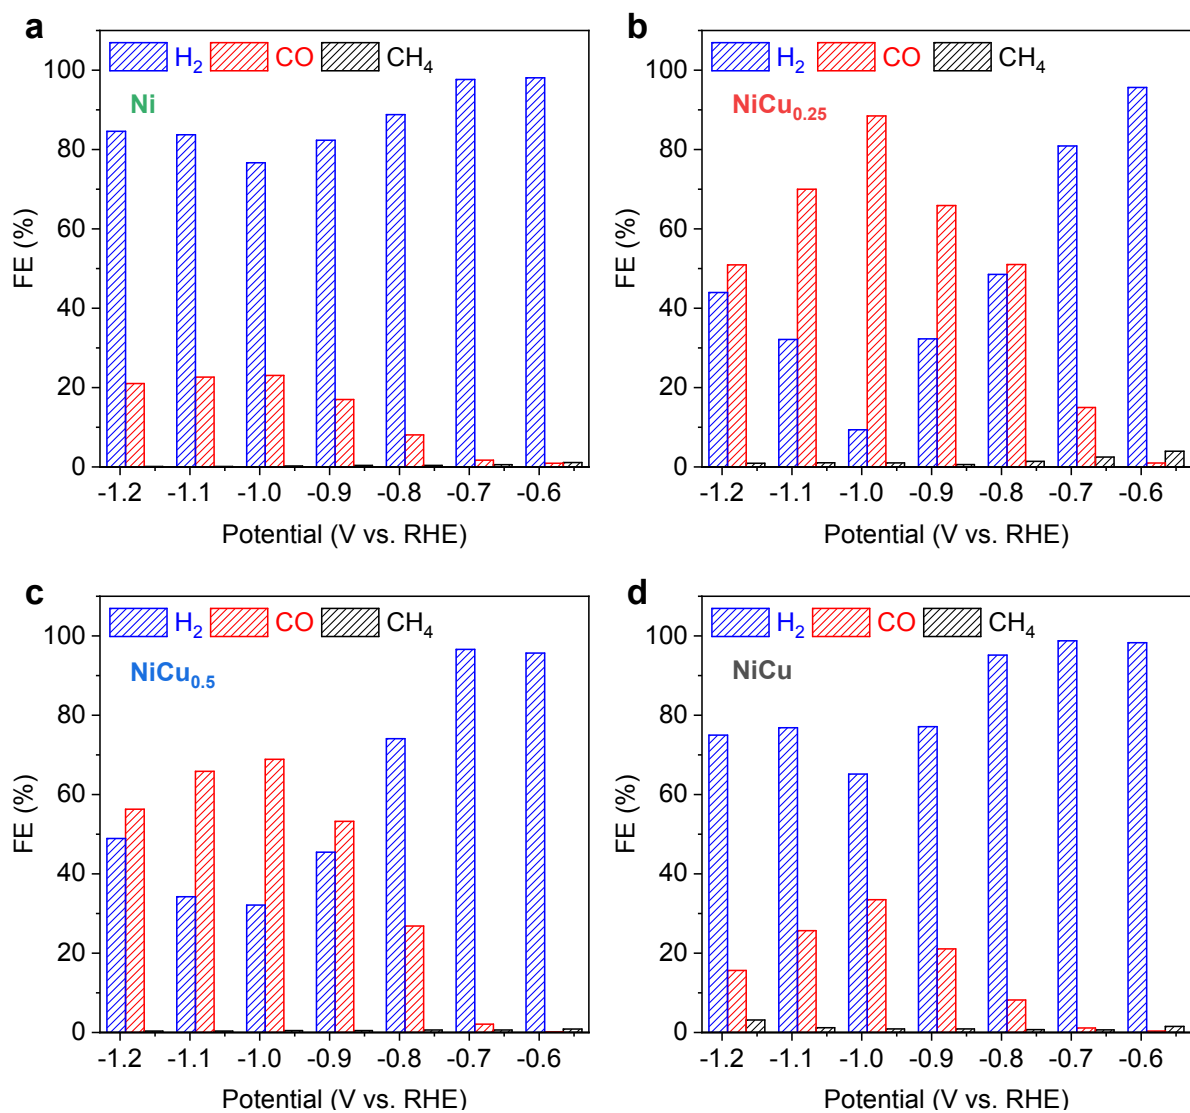

**Fig. S10** Measured FE distributions of CO<sub>2</sub> electroreduction on (a) Ni, (b) NiCu<sub>0.25</sub>, (c) NiCu<sub>0.5</sub>, and (d) NiCu in CO<sub>2</sub>-saturated 0.1 M KHCO<sub>3</sub> electrolyte.

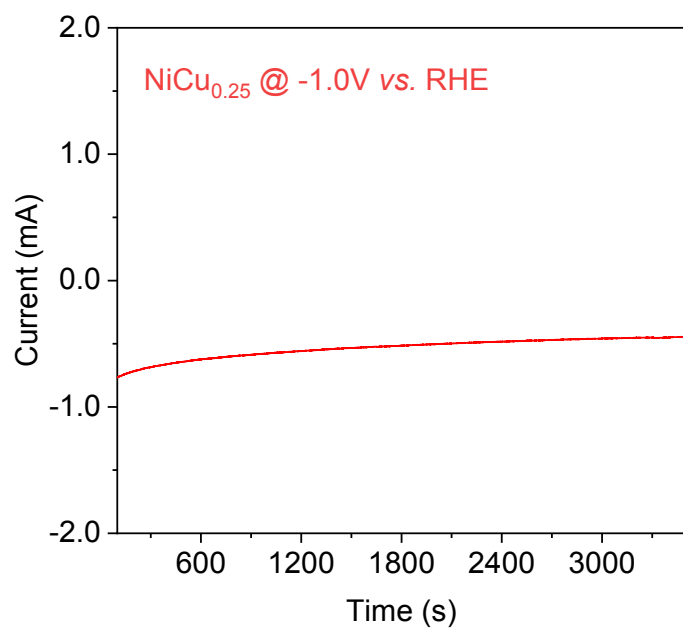

**Fig. S11** Current-time dependence of NiCu<sub>0.25</sub> for CO<sub>2</sub> electroreduction in CO<sub>2</sub>-saturated 0.1 M KHCO<sub>3</sub> electrolyte at -1.0 V vs. RHE.

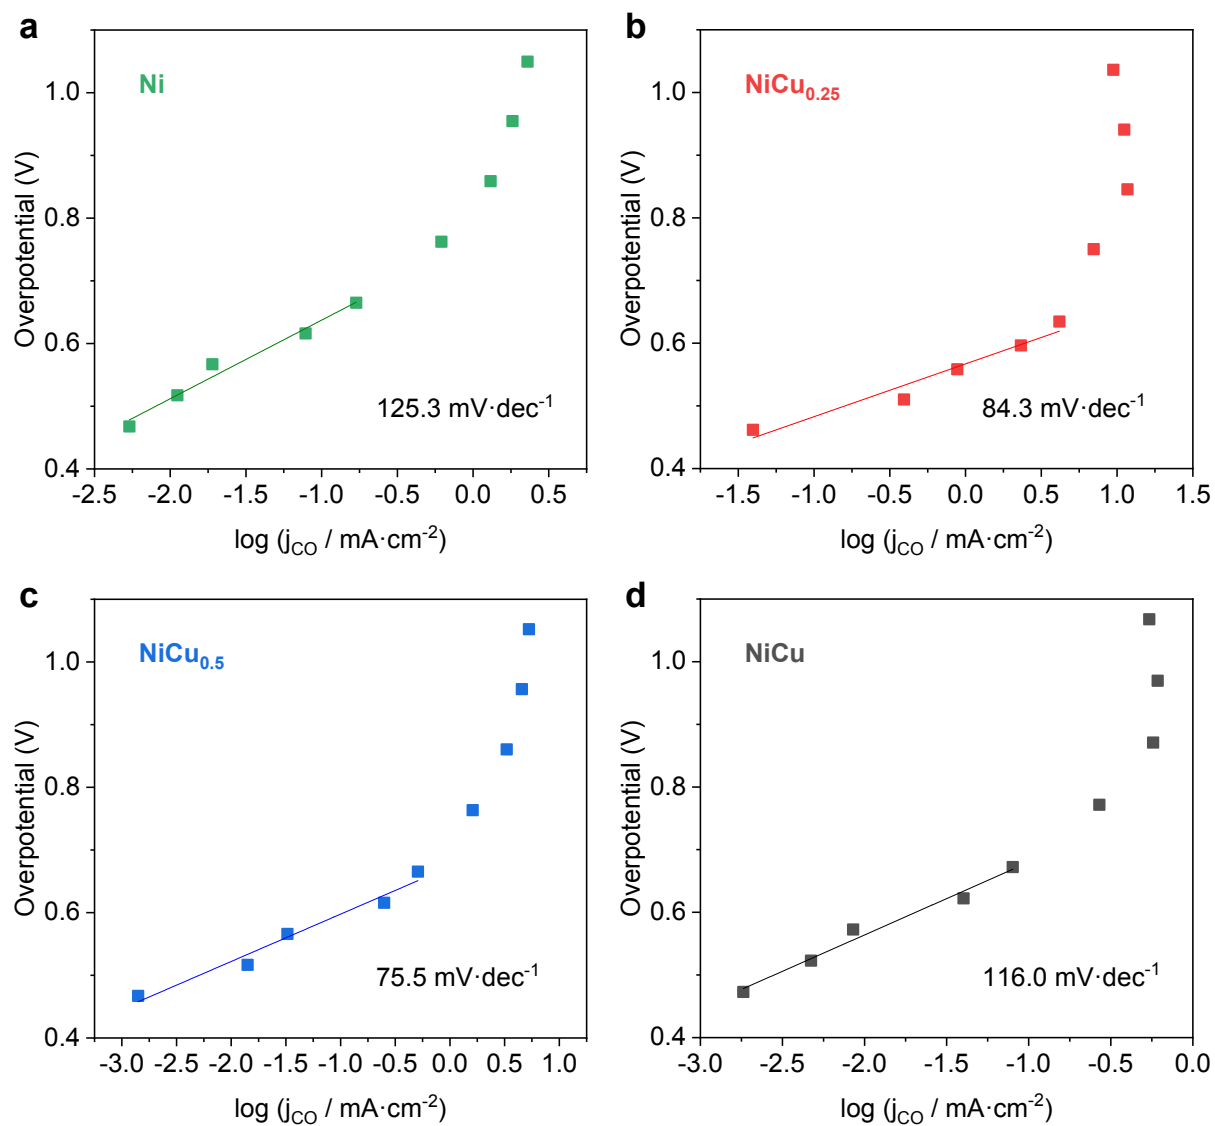

**Fig. S12** Tafel plots for CO evolution on (a) Ni, (b) NiCu<sub>0.25</sub>, (c) NiCu<sub>0.5</sub>, and (d) NiCu in CO<sub>2</sub>-saturated 0.1 M KHCO<sub>3</sub> electrolyte.

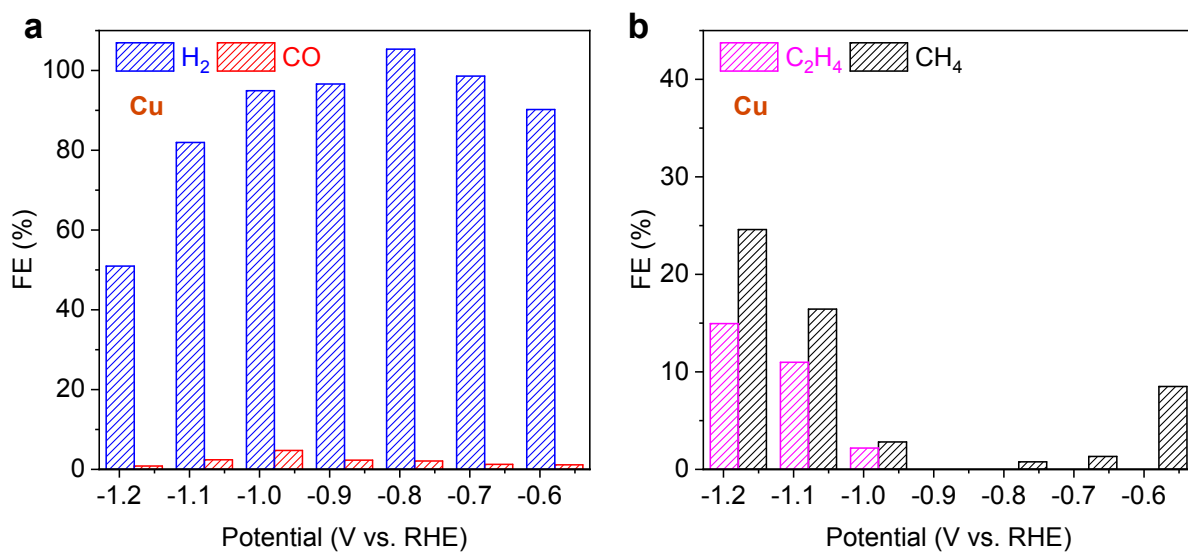

**Fig. S13** Measured FEs toward (a) H<sub>2</sub>, CO, and (b) hydrocarbons on the Cu catalyst.

**Table S1.** Theoretical and STEM-EDS measured atomic ratios of Cu-to-Ni.

| Sample   | Atomic ratios of Cu-to-Ni |                 |
|----------|---------------------------|-----------------|
|          | <i>Theoretical</i>        | <i>Measured</i> |
| NiCu     | 1.00                      | 0.95            |
| NiCu0.5  | 0.50                      | 0.46            |
| NiCu0.25 | 0.25                      | 0.24            |
| Ni       | 0.00                      | N/A             |

**Table S2.** Surface chemical composition measured by XPS

| Signals | Atomic%     |                           |                            |           |
|---------|-------------|---------------------------|----------------------------|-----------|
|         | <i>NiCu</i> | <i>NiCu<sub>0.5</sub></i> | <i>NiCu<sub>0.25</sub></i> | <i>Ni</i> |
| C 1s    | 62.84       | 66.41                     | 63.02                      | 69.78     |
| N 1s    | 5.5         | 4.82                      | 4.17                       | 3.93      |
| O 1s    | 18.32       | 15.81                     | 17.95                      | 14.37     |
| Ni 2p   | 5.5         | 7.67                      | 10.61                      | 10.52     |
| Cu 2p   | 7.84        | 5.29                      | 4.25                       | N/A       |

### **Part III: References**

1. K. Zhang, J. Ran, B. Zhu, H. Ju, J. Yu, L. Song and S. Z. Qiao, *Small*, 2018, **14**, 1801705.
2. K. P. Kuhl, E. R. Cave, D. N. Abram and T. F. Jaramillo, *Energy Environ. Sci.*, 2012, **5**, 7050-7059.
